# Supplementary material
Source: publisher figshare collection journal article supplement (https://karger.figshare.com/ndownloader/files/13050872)
Supplement: Supplementary file 1 [file 13050872]

**Supplemental Figure.** Mean head circumference (HC) z-score change over gestation and the first six months of life in intervention and control groups. The curves are derived from modeled regression slopes for HC z-score change during gestation (given different enrollment times), the mean postnatal HC z-score at birth by group, and mean postnatal HC z-score at 6 months by group. Fetal z-scores were based on gestational age, while postnatal z-scores were based on age and sex. [29, 32]
